# Supplementary material for: Sequential chemo–biocatalytic synthesis of aroma compounds
Source: Royal Society of Chemistry journal article supplement (doi:10.1039/d2gc02866b), 2022-12-08
Supplement: d2gc02866b1.pdf [file d2gc02866b1.pdf]

## Supporting Information

### **Sequential chemo-biocatalytic synthesis of aroma compounds**

Romina D. Ceccoli,<sup>a</sup> Dario A. Bianchi<sup>\*b</sup> and Daniela V. Rial<sup>\*a</sup>

<sup>a</sup> Área Biología Molecular, Departamento de Ciencias Biológicas, Facultad de Ciencias Bioquímicas y Farmacéuticas, Universidad Nacional de Rosario (UNR), Consejo Nacional de Investigaciones Científicas y Técnicas (CONICET), Suipacha 531, S2002LRK Rosario, Argentina. E-mail: rial@inv.rosario-conicet.gov.ar, drial@fbioyf.unr.edu.ar

<sup>b</sup> Instituto de Química Rosario (IQUIR, CONICET-UNR), Departamento de Química Orgánica, Facultad de Ciencias Bioquímicas y Farmacéuticas, Universidad Nacional de Rosario (UNR), Suipacha 531, S2002LRK Rosario, Argentina. E-mail: bianchi@iquir-conicet.gov.ar, dbianchi@fbioyf.unr.edu.ar

## Contents

### List of abbreviations

### Supporting figures

- Fig. S1 GC chromatograms of Baker's yeast biotransformation of benzalacetone.
- Fig. S2 GC chromatograms of biotransformations of a mixture of benzylacetone and 4-phenyl-2-butanol catalysed by *Escherichia coli* cells expressing *BdADH2*.
- Fig. S3 Biotransformation of benzylacetone or 4-phenyl-2-butanol by non-recombinant *E. coli* cells.
- Fig. S4 Purification of recombinant *BdADH2*.
- Fig. S5 Representative GC chromatograms of biotransformations of a mixture of benzylacetone and 4-phenyl-2-butanol catalysed by *E. coli* cells expressing individually *LbBVMO* and *BdADH2*.
- Fig. S6 Purification of recombinant *LbBVMO*.
- Fig. S7 Representative GC chromatograms of biotransformations of a mixture of benzylacetone and 4-phenyl-2-butanol catalysed by *E. coli* cells coexpressing *LbBVMO* and *BdADH2*.
- Fig. S8 Representative GC chromatograms of the biotransformations involved in the proposed route under preparative conditions.

### Supporting tables

- Table S1 Environmental impact assessment of the aldol condensation between benzaldehyde and acetone using NaOH as catalyst.
- Table S2 Bioproduction of 2-phenylethyl acetate and 2-phenylethanol in microbial systems.

## List of abbreviations

|                |                                                                          |
|----------------|--------------------------------------------------------------------------|
| <i>Bd</i> ADH2 | Alcohol dehydrogenase from <i>Bradyrhizobium diazoefficiens</i> USDA 110 |
| GC             | Gas chromatography                                                       |
| IS             | Internal standard                                                        |
| <i>Lb</i> BVMO | Baeyer-Villiger monooxygenase from <i>Leptospira biflexa</i>             |

## Supporting figures

### A Yeast biotransformation at pH 8.0

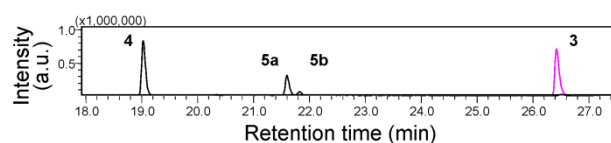

### B Yeast biotransformation at pH 9.0

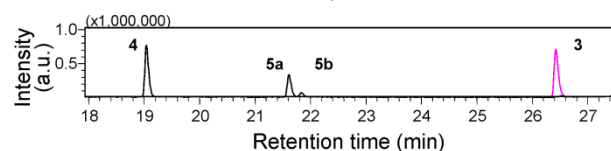

### C Standard compounds

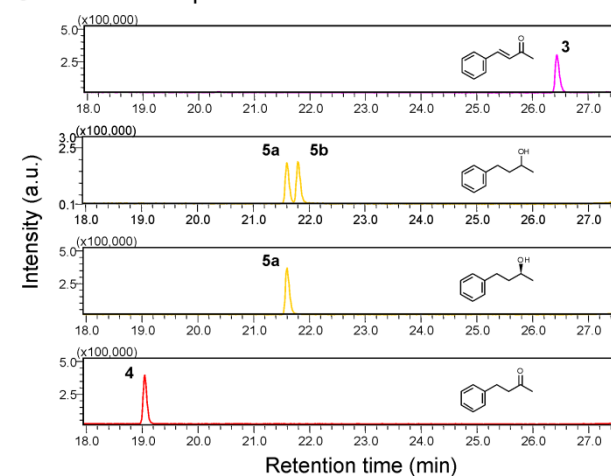

**Fig. S1 GC chromatograms of Baker's yeast biotransformation of benzalacetone.** Baker's yeast-catalysed biotransformation of benzalacetone (**3**) at 0 h (pink) and after 16 h (black) at pH 8.0 (A) and pH 9.0 (B). (C) GC chromatograms of standard compounds are shown: **4**, benzylacetone; **5a**, S-(+)-4-phenyl-2-butanol; **5b**, R-(-)-4-phenyl-2-butanol. The region of the chromatograms between 18.0–27.4 min is shown. Retention time of the internal standard: 4.72 min.

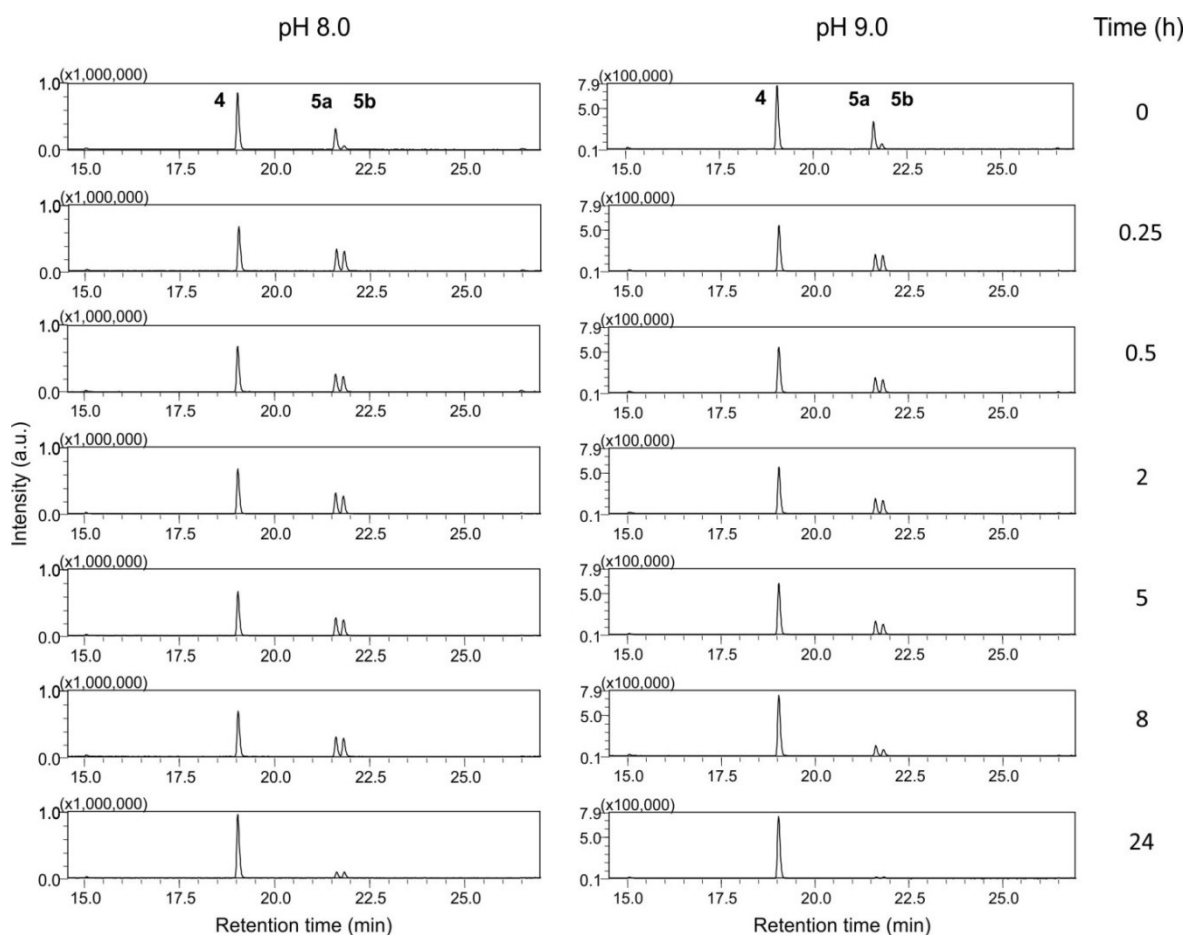

**Fig. S2 GC chromatograms of biotransformations of a mixture of benzylacetone and 4-phenyl-2-butanol catalysed by *Escherichia coli* cells expressing *BdADH2*.** Reactions were stopped after different periods of incubation (0 h, 0.25 h, 0.5 h, 2 h, 5 h, 8 h and 24 h) at either pH 8.0 or 9.0. The starting material was obtained after 16 h of Baker's yeast biotransformation of benzalacetone at the corresponding pH condition. The region of the chromatograms between 14.5–27.0 min is shown. Retention time of the internal standard: 4.72 min. **4**, benzylacetone; **5a**, *S*-(+)-4-phenyl-2-butanol; **5b**, *R*-(-)-4-phenyl-2-butanol.

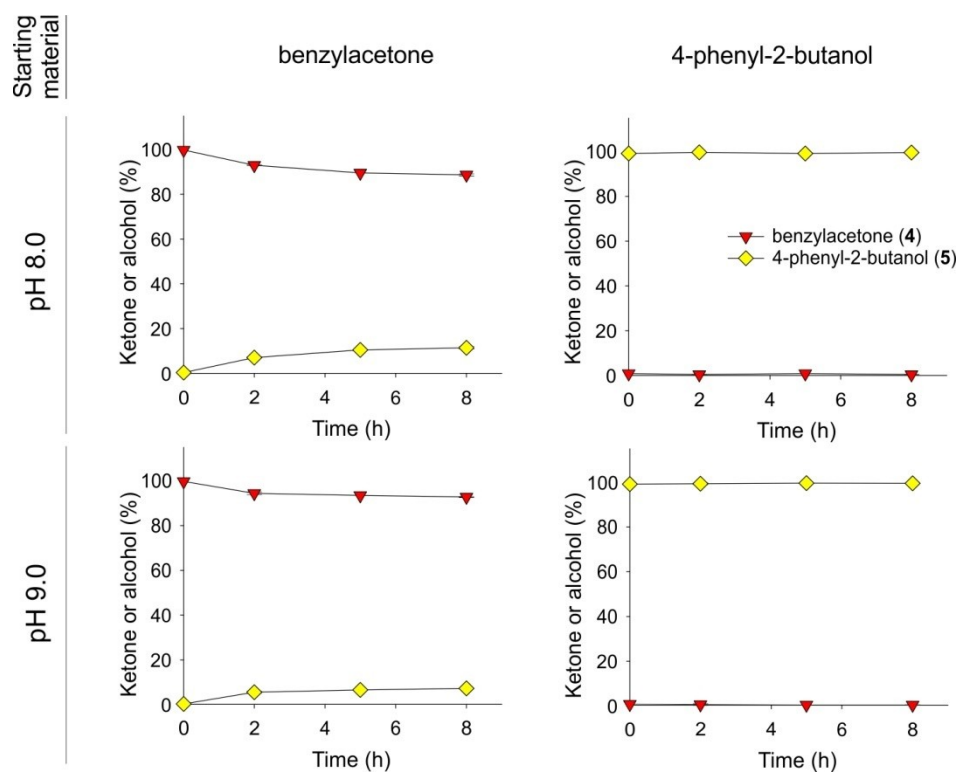

**Fig. S3 Biotransformation of benzylacetone or 4-phenyl-2-butanol by non-recombinant *E. coli* cells.** The starting material was benzylacetone (4) or 4-phenyl-2-butanol (5). The effect of two different pH conditions (8.0 and 9.0) was evaluated.

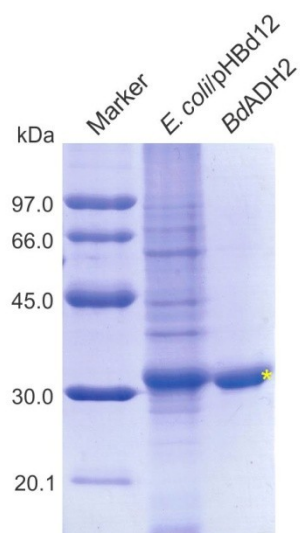

**Fig. S4 Purification of recombinant *BdADH2*.** The soluble fraction corresponding to the protein extract of *E. coli* BL21(DE3) transformed with pHBd12 and expressing *BdADH2*, and the purified *BdADH2* (yellow asterisk) were subjected to 12% SDS-PAGE followed by Coomassie Brilliant Blue staining. Marker, molecular mass marker.

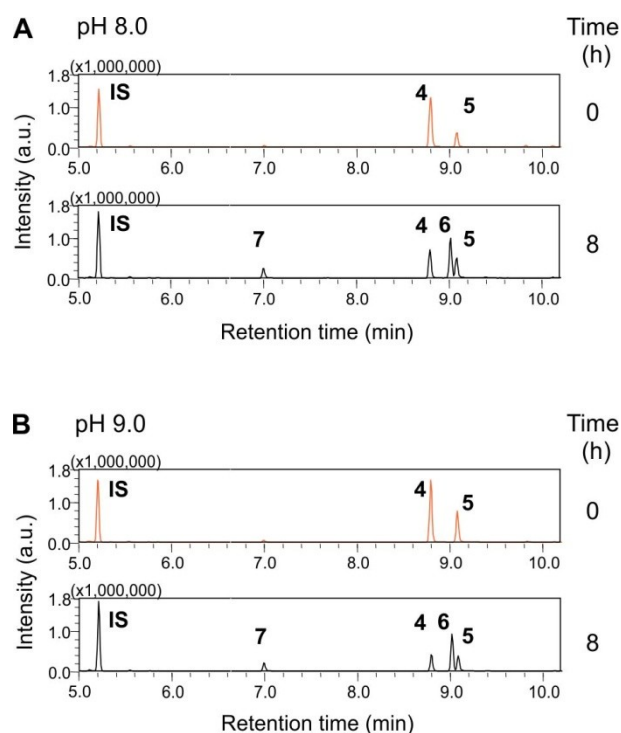

**Fig. S5 Representative GC chromatograms of biotransformations of a mixture of benzylacetone and 4-phenyl-2-butanol catalysed by *E. coli* cells expressing individually *LbBVMO* and *BdADH2*.** Chromatograms correspond to 0 h (orange) and 8 h (black) of reaction at either pH 8.0 (A) or pH 9.0 (B). The starting material was obtained after 16 h of Baker's yeast biotransformation of benzalacetone at the corresponding pH condition. The region of the chromatograms between 5.0–10.2 min is shown. **4**, benzylacetone; **5**, 4-phenyl-2-butanol; **6**, 2-phenylethyl acetate; **7**, 2-phenylethanol; **IS**, internal standard.

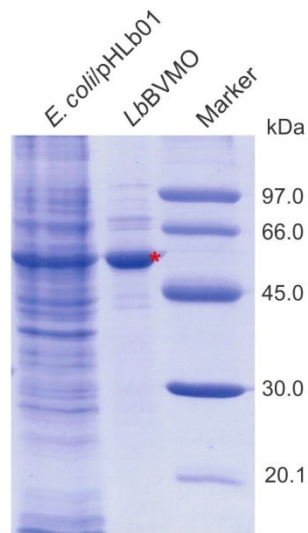

**Fig. S6 Purification of recombinant *LbBVMO*.** The soluble fraction of protein extracts of *E. coli* BL21(DE3) transformed with pHLb01 and expressing *LbBVMO*, and the purified *LbBVMO* (red asterisk) were subjected to 12% SDS-PAGE followed by Coomassie Brilliant Blue staining. Marker, molecular mass marker.

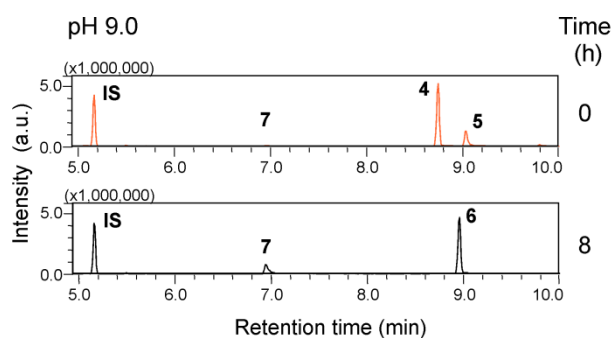

**Fig. S7 Representative GC chromatograms of biotransformations of a mixture of benzylacetone and 4-phenyl-2-butanol catalysed by *E. coli* cells coexpressing *LbBVMO* and *BdADH2*.** Chromatograms correspond to 0 h (orange) and 8 h (black) of reaction at pH 9.0. The starting material was obtained after 16 h of Baker's yeast biotransformation of benzalacetone. The region of the chromatograms between 5.0–10.2 min is shown. **4**, benzylacetone; **5**, 4-phenyl-2-butanol; **6**, 2-phenylethyl acetate; **7**, 2-phenylethanol; **IS**, internal standard.

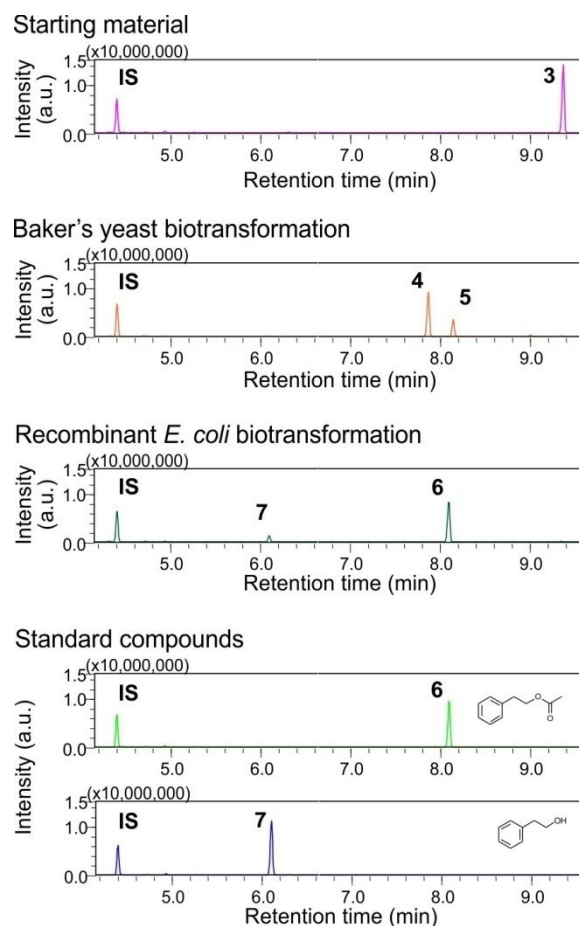

**Fig. S8 Representative GC chromatograms of the biotransformations involved in the proposed route under preparative conditions.** Baker's yeast biotransformation of benzalacetone at pH 9.0, at 0 h (pink) and 16 h (orange) of reaction. Biotransformation catalysed by *E. coli* cells coexpressing *LbBVMO* and *BdADH2* at pH 9.0 after 8 h of reaction (dark green). GC chromatograms of standards of products are shown. The region of the chromatograms between 4.2–9.6 min is shown. **3**, benzalacetone; **4**, benzylacetone; **5**, 4-phenyl-2-butanol; **6**, 2-phenylethyl acetate; **7**, 2-phenylethanol; **IS**, internal standard.

## Supporting tables

**Table S1** Environmental impact assessment of the aldol condensation between benzaldehyde and acetone using NaOH as catalyst

|                                | <i>E</i> -factor |                  |         |              |        | Yield (%) |
|--------------------------------|------------------|------------------|---------|--------------|--------|-----------|
|                                | reaction         | reaction solvent | work-up | purification | total  |           |
| Kad <i>et al.</i> , 1999       | 10.4             | 77.0             | 593.3   | 14.0         | 694.8  | 85        |
| Tatsuzaki <i>et al.</i> , 2006 | 15.1             | 19.9             | 247.5   | 30.1         | 312.6  | 34        |
| Xiao <i>et al.</i> , 2016      | 14.0             | 0                | 63.4    | 941.8        | 1019.1 | 53        |
| Nam <i>et al.</i> , 2020       | 3.6              | 2.2              | 88.8    | 811.3        | 905.8  | 66        |
| our procedure A                | 7.8              | 0                | 0.5     | 1174.9       | 1183.2 | 51        |
| our procedure B                | 12.2             | 0                | 9.6     | 531.1        | 552.8  | 51        |
| our procedure C                | 4.1              | 0                | 6.1     | 212.1        | 222.3  | 56        |

If no information on the amount of auxiliary materials employed was available, we made the following assumptions: 50 mL g<sup>-1</sup> of crude product of solvents for extraction; 20% of extract volume of aqueous solutions for washing; 10% of extract volume of brine; 0.02 g mL<sup>-1</sup> of extract volume of anhydrous salts for drying extracts; 10 mL g<sup>-1</sup> of crude product of solvents for recrystallisation; the amount of catalyst, as well as the amounts of solvents and silica used for flash chromatography were comparable to our procedure A. The *E*-factor values calculated with estimated quantities are indicated in blue.

**Table S2** Bioproduction of 2-phenylethyl acetate and 2-phenylethanol in microbial systems

| Biocatalyst                                | Substrate            | Products                                |                                           | Reference                             |
|--------------------------------------------|----------------------|-----------------------------------------|-------------------------------------------|---------------------------------------|
| Submerged fermentation                     |                      | 2-PEA (mgL <sup>-1</sup> )              | 2-PE (mgL <sup>-1</sup> )                 |                                       |
| <i>Hanseniaspora guilliermondii</i>        | 2-PE                 | 164                                     | n.a.                                      | Rojas <i>et al.</i> , 2001            |
| <i>Kluyveromyces marxianus</i> CBS 600     |                      |                                         |                                           |                                       |
| i) batch at 35 °C                          | L-phe (molasses      | i) 1270                                 | i) 2200                                   | Etschmann <i>et al.</i> , 2005        |
| ii) in situ product removal at 45°C        | medium)              | ii) 4000                                | ii) 1600                                  | Etschmann <i>et al.</i> , 2005        |
| iii) fed-batch + polypropylene glycol 1200 |                      | iii) 6100                               | iii) 26500                                | Etschmann <i>et al.</i> , 2006        |
| <i>Kluyveromyces marxianus</i> KY3         |                      |                                         |                                           |                                       |
| i) aerobic conditions                      | Raw milk             | i) 1                                    | i) 469                                    | Chang <i>et al.</i> , 2014            |
| ii) anaerobic conditions                   |                      | ii) 435                                 | ii) 965                                   | Chang <i>et al.</i> , 2014            |
| <i>Kluyveromyces marxianus</i>             |                      |                                         |                                           |                                       |
| i) ITD0211 strain                          | L-phe                | i) 203                                  | i) 630                                    | Adame-Soto <i>et al.</i> , 2019       |
| ii) ITD0090 strain                         |                      | ii) 177                                 | ii) 1024                                  | Adame-Soto <i>et al.</i> , 2019       |
| <i>Candida glabrata</i>                    |                      |                                         |                                           |                                       |
| i) DNP medium                              | i) L-phe             | i) 35                                   | n.d.                                      | Rodríguez-Romero <i>et al.</i> , 2020 |
| ii) ECP medium                             | ii) L-phe            | ii) 665                                 |                                           | Rodríguez-Romero <i>et al.</i> , 2020 |
| iii) supplemented tequila vinasse          | iii) tequila vinasse | iii) 60                                 |                                           | Rodríguez-Romero <i>et al.</i> , 2020 |
| Solid-state fermentation                   |                      | (mg g <sup>-1</sup> TS)                 | (mg g <sup>-1</sup> TS)                   |                                       |
| <i>Kluyveromyces marxianus</i>             |                      |                                         |                                           |                                       |
| i) batch                                   | Sugarcane bagasse    | i) 3.9 <sup>a</sup> ; 7.0 <sup>b</sup>  | i) 12.1 <sup>a</sup> ; 10.0 <sup>b</sup>  | Martínez <i>et al.</i> , 2018;        |
|                                            | +L-phe               |                                         |                                           | Martínez-Ávila <i>et al.</i> , 2019   |
| ii) fed-batch                              |                      | ii) 8.2 <sup>a</sup> ; 5.7 <sup>b</sup> | ii) 10.2 <sup>a</sup> ; 13.5 <sup>b</sup> | Martínez <i>et al.</i> , 2018;        |
|                                            |                      |                                         |                                           | Martínez-Ávila <i>et al.</i> , 2019   |
| iii) sequential-batch                      |                      | iii) 8.6                                | iii) 11.5                                 | Martínez-Ávila <i>et al.</i> , 2019   |

L-phe, L-phenylalanine; n.a., not applicable; n.d., not determined; TS, initial total solid content of substrate. <sup>a</sup>Ref. Martínez *et al.*, 2018; <sup>b</sup>Ref. Martínez-Ávila *et al.*, 2019.

L-phe, L-phenylalanine; n.a., not applicable; n.d., not determined; TS, initial total solid content of substrate. <sup>a</sup>Ref. Martínez *et al.*, 2018; <sup>b</sup>Ref. Martínez-Ávila *et al.*, 2019.
